# Supplementary material for: Cortical Excitability Measured with nTMS and MEG during Stroke Recovery
Source: Hindawi journal article supplement (doi:10.1155/2015/309546), 2015-01-01
Supplement: f1 [file 309546.f1.pdf]

*Supplementary Table 1:* Individual motor thresholds as a percentage of maximum stimulator output from the lesioned (LH) and non-lesioned (NH) hemispheres at T1(1 month) and T2 (three months) after the stroke. S.D. indicates standard deviation.

| Patient         | LH T1       | LH T2       | NH T1       | NH T2       |
|-----------------|-------------|-------------|-------------|-------------|
| 1               | n.d.        | n.d.        | 85          | 91          |
| 2               | 50          | 56          | 55          | 51          |
| 3               | 75          | 78          | 57          | 58          |
| 4               | n.d.        | n.d.        | 71          | 81          |
| 5               | 43          | 44          | 34          | 41          |
| 6               | 57          | 50          | 42          | 42          |
| 7               | 49          | 57          | 47          | 47          |
| 8               | 54          | 51          | 54          | 46          |
| 9               | 80          | 75          | 59          | 61          |
| 10              | 46          | 49          | 43          | 42          |
| 11              | 78          | 64          | 77          | 64          |
| 12              | 63          | 58          | 54          | 51          |
| 13              | 64          | 56          | 67          | 69          |
| Mean $\pm$ S.D. | 60 $\pm$ 13 | 58 $\pm$ 11 | 57 $\pm$ 15 | 57 $\pm$ 16 |

*Supplementary Table 2:* Mean values and standard deviations of the nTMS parameters at T1(1 month) and T2 (three months) after the stroke. MT indicates motor threshold as a percentage of the maximum stimulator output. Short intracortical inhibition (SICI) and intracortical facilitation (ICF) are given as normalized values; actual amplitude values have been divided with the MEP amplitude elicited by a single-pulse nTMS.

|    | Lesioned Hemisphere |               |               | Non-lesioned Hemisphere |                |                  |
|----|---------------------|---------------|---------------|-------------------------|----------------|------------------|
|    | MT                  | SICI          | ICF           | MT                      | SICI           | ICF              |
| T1 | 60 $\pm$ 13%        | 0.8 $\pm$ 0.6 | 3.6 $\pm$ 2.1 | 57 $\pm$ 15%            | 6.5 $\pm$ 15.7 | 29.9 $\pm$ 95.46 |
| T2 | 58 $\pm$ 11%        | 2.4 $\pm$ 5.2 | 2.5 $\pm$ 1.5 | 57 $\pm$ 16%            | 1.0 $\pm$ 1.1  | 2.4 $\pm$ 3.0    |

*Supplementary Table 3:* Mean values and standard deviations of the MEG parameters at T1(1 month) and T2 (three months) after the stroke. Event-related desynchronization (ERD) and event-related synchronization (ERS) are given as a percentage of the prestimulus baseline amplitude in the selected frequency band. SI indicates the source strength of the somatosensory evoked fields elicited by stimulation of digit 2 (in nAm), and SIhr the distance of the representations of digit 1 and 5 in the hand somatosensory cortex (in mm). Values indicated with \* differ significantly at  $p < .05$ , those indicated with \*\* differ at  $p < .003$ .

|    | Lesioned Hemisphere |             |              |           | Non-lesioned Hemisphere |             |              |              |
|----|---------------------|-------------|--------------|-----------|-------------------------|-------------|--------------|--------------|
|    | ERD%                | ERS%        | SI (nAm)     | SIhr (mm) | ERD%                    | ERS%        | SI (nAm)     | SIhr (mm)    |
| T1 | 32 $\pm$ 14         | 46.±31*     | 25 $\pm$ 11* | 12.±3**   | 35 $\pm$ 10             | 63.±32*     | 32 $\pm$ 13* | 10 $\pm$ 3** |
| T2 | 36 $\pm$ 11         | 47 $\pm$ 32 | 22 $\pm$ 14  | 10.±3     | 37 $\pm$ 13             | 61 $\pm$ 35 | 23 $\pm$ 22  | 10 $\pm$ 3   |
